# Supplementary material
Source: MDPI journal article supplement (https://www.mdpi.com/2073-4344/12/3/284)
Supplement: s1 [file s1]

# Comparing the Performance of Supported Ru Nanocatalysts Prepared by Chemical Reduction of $\text{RuCl}_3$ and Thermal Decomposition of $\text{Ru}_3(\text{CO})_{12}$ in the Sunlight-Powered Sabatier Reaction

Daria Burova <sup>1,2,3</sup>, Jelle Rohlfs <sup>4</sup>, Francesc Sastre <sup>4</sup>, Pau Martínez Molina <sup>4</sup>, Nicole Meulendijks <sup>4</sup>, Marcel A. Verheijen <sup>5,6</sup>, An-Sofie Kelchtermans <sup>1,2,3</sup>, Ken Elen <sup>1,2,3</sup>, An Hardy <sup>1,2,3</sup>, Marlies K. Van Bael <sup>1,2,3,\*</sup> and Pascal Buskens <sup>1,4,\*</sup>

<sup>1</sup> Institute for Materials Research, Design and Synthesis of Inorganic Materials (DESINe), Hasselt University, Agoralaan Building D, B-3590 Diepenbeek, Belgium; daria.burova@uhasselt.be (D.B.); ansophie.kelchtermans@uhasselt.be (A.-S.K.); ken.elen@uhasselt.be (K.E.); an.hardy@uhasselt.be (A.H.)

<sup>2</sup> IMEC VZW, IMOMEC Associated Laboratory, Wetenschapspark 1, B-3590 Diepenbeek, Belgium

<sup>3</sup> EnergyVille, Thor Park 8320, B-3600 Genk, Belgium

<sup>4</sup> The Netherlands Organisation for Applied Scientific Research (TNO), High Tech Campus 25, 5656AE Eindhoven, The Netherlands; jelle.rohlfs@tno.nl (J.R.); francesc.sastrecalabuig@tno.nl (F.S.); martinezmolina.pau@gmail.com (P.M.M.); nicole.meulendijks@tno.nl (N.M.)

<sup>5</sup> Department of Applied Physics, Eindhoven University of Technology, 5600MB Eindhoven, The Netherlands ; marcelverheijen@eurofinseag.com

<sup>6</sup> Eurofins Materials Science, High Tech Campus 11, 5656AE Eindhoven, The Netherlands

\* Correspondence: marlies.vanbael@uhasselt.be (M.K.V.B.); pascal.buskens@tno.nl (P.B.)

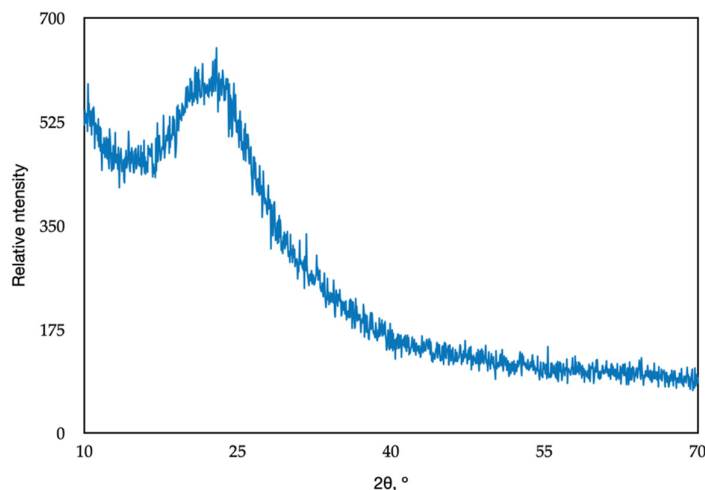

**Figure S1.** X-ray diffractogram of SiO<sub>2</sub> supported Ru catalyst prepared by reduction of RuCl<sub>3</sub>.

The powder X-ray diffraction pattern was recorded using a Bruker AXS D8 Discover diffractometer (Cu K $\alpha$  radiation, LynxEye detector). The broad peak centered at  $2\theta = 23.8^\circ$  represents the short range order in amorphous SiO<sub>2</sub>. The X-ray diffraction analysis neither shows diffraction peaks of crystalline Ru nanoparticles on the SiO<sub>2</sub> support (expected at  $2\theta \approx 37^\circ$  and  $2\theta \approx 45^\circ$  [1]), nor reflections corresponding to crystalline RuO<sub>2</sub> [1] (expected at  $2\theta \approx 28^\circ$ ,  $2\theta \approx 35^\circ$  and  $2\theta \approx 54^\circ$ ). *Ergo*, due to the low Ru loading and small particle size, Ru reflections could not be detected.

[1] JCPDS reference patterns: Ru 00-006-0663; RuO<sub>2</sub> 00-040-1290.

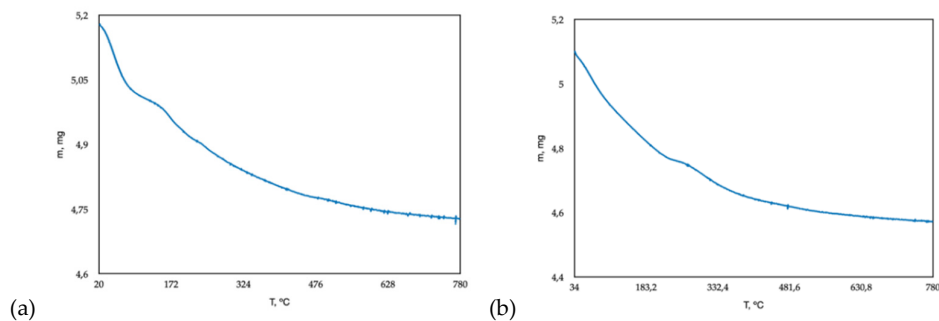

**Figure S2.** Thermogravimetric analyses of (a) SiO<sub>2</sub>-supported and (b) Al<sub>2</sub>O<sub>3</sub>-supported Ru catalyst prepared by reduction of RuCl<sub>3</sub>, under air.

The thermal decomposition profiles of the samples were studied by thermogravimetric analysis (TGA, TA instruments Q500). The samples (~5 mg) were heated up to 800 °C at a heating rate of 10 °C/min under the air atmosphere. In both cases, the TGA analysis shows a mass loss of about 10%, which is likely due to loss of adsorbed water and progressive condensation of Si-OH and Al-OH groups.

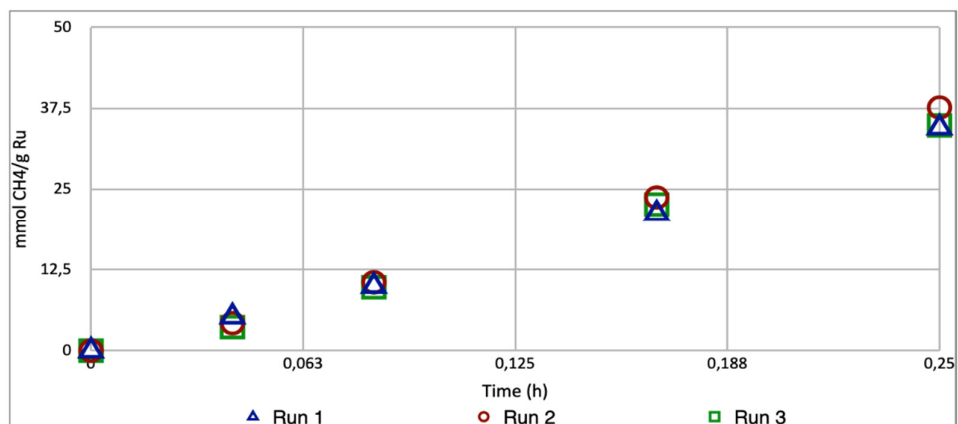

**Figure S3.** Conversion-time profile for three sequential runs of the sunlight-powered Sabatier reaction with Ru/SiO<sub>2</sub>-TD. Ru loading is 3.49% w/w. Reaction conditions for all experiments: reaction mixture of H<sub>2</sub>/CO<sub>2</sub>/N<sub>2</sub> (4.5:1:1) at  $3.5 \pm 0.2$  bar pressure, 200 mg of Ru/SiO<sub>2</sub>-TD catalyst, light intensity of 6.66 suns, catalyst bed temperature approximately 220°C.

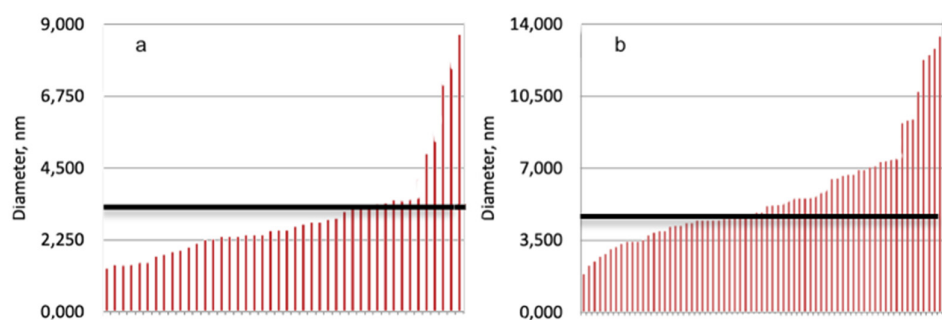

**Figure S4.** Comparison of mean diameter of Ru nanoparticles and numbers of agglomerates before (a) and after (b) reaction for Ru/SiO<sub>2</sub>-CR catalysts with a Ru loading on silica of 3.34% w/w. The black line in both diagrams indicates the border between single particles and agglomerates.

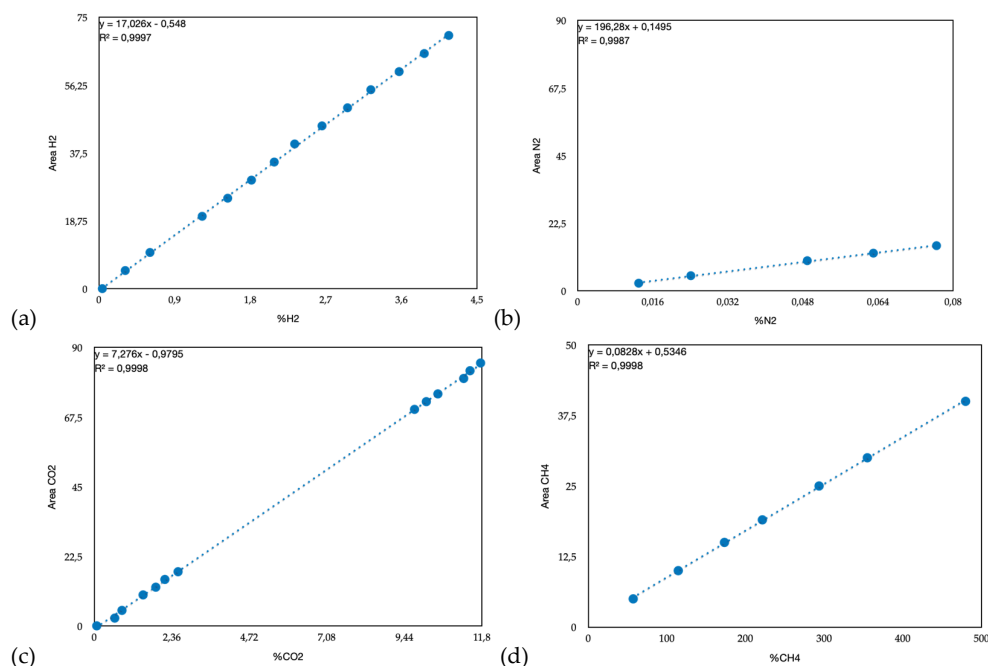

**Figure S5.** Calibration curves for GC detection of (a) H<sub>2</sub>, (b) N<sub>2</sub>, (c) CO<sub>2</sub> and (d) CH<sub>4</sub>.

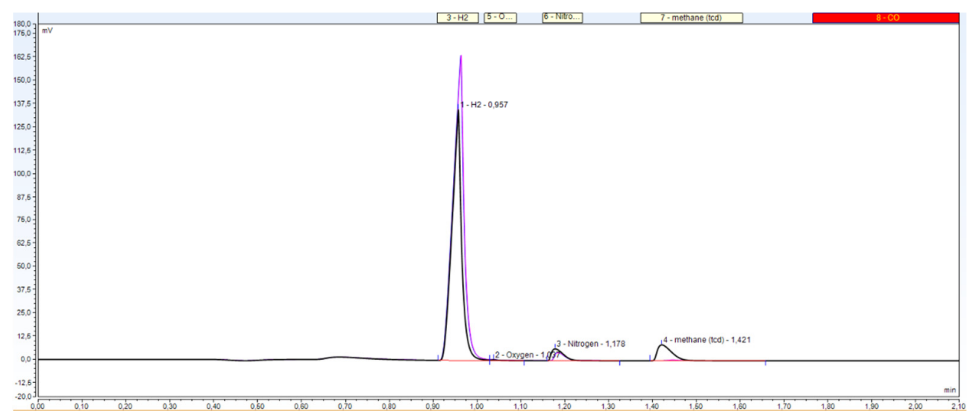

**Figure S6.** Prototypical gas chromatogram for catalytic conversion of CO<sub>2</sub> and H<sub>2</sub> to CH<sub>4</sub> in a mixture diluted with N<sub>2</sub>.
